# Supplementary material for: A glucose-responsive complex polymeric micelle enabling repeated on–off release and insulin protection
Source: Royal Society of Chemistry journal article supplement (doi:10.1039/c2sm26690c), 2012-12-11
Supplement: c2sm26690c.pdf [file c2sm26690c.pdf]

**Supplementary Information**

**A glucose-responsive complex polymeric micelle  
enabling repeated on-off release and insulin protection**

Gan Liu, Rujiang Ma, Jie Ren, Zhong Li, Haixia Zhang, Yingli An, and Linqi Shi\*

Key Laboratory of Functional Polymer Materials, Ministry of Education, and Institute of Polymer  
Chemistry, Nankai University, Tianjin 300071, China

Email: Shilinqi@nankai.edu.cn

### 1-1 Synthesis of *t*-Boc-aminoethyl 2-bromoisobutyrate (BEBIB)

BEBIB was synthesized similar to ref.<sup>1</sup> A solution of *t*-Boc-aminoethyl alcohol (1.61 g, 10 mmol) and triethylamine (1.11 g, 11 mmol) in methylene chloride (50 mL) was cooled in an ice bath. Into the solution was added 2-bromoisobutyryl bromide (2.29 g, 10 mmol) in methylene chloride (20 mL). The reaction was slowly warmed to room temperature and stirred for 4 h. The salt was filtered off and the reaction mixture was extracted sequentially with water and saturated sodium bicarbonate solution. The organic phase was dried over magnesium sulfate. Solvent was evaporated and the crude product was purified by column chromatography using heptane/diethyl ether (80/20, w/w) as an eluent to get a pale-yellow liquid. Then it was dissolved and crystallized in a little bit of *n*-hexane at 4 °C to give 2.6 g of BEBIB as a white acicular crystal (yield 84%). <sup>1</sup>H-NMR (CDCl<sub>3</sub>) δ (ppm): 1.45 (e, 9 H), 1.95 (a, 6 H), 3.44-3.46 (c, 2 H), 4.23-4.25 (b, 2 H), 4.78 (d, H) .

### 1-2 Synthesis of Monoamino-terminated poly(*N*-isopropylacrylamide) (PNIPAM<sub>130</sub>-NH<sub>2</sub>)

Firstly *N*-*t*Boc-PNIPAM was synthesized by ATRP of *N*-isopropylacrylamide using BEBIB as initiator and CuCl/Me<sub>6</sub>TREN as catalyst. The detailed process is introduced as follows. CuCl (110 mg, 1.1 mmol) and Me<sub>6</sub>TREN (276 mg, 1.2 mmol) were introduced into the reaction flask and then DMF (4 mL) was added. The sample was first stirred with ultrasonic followed by the addition of *N*-isopropylacrylamide (11.3 g, 0.1 mol) dissolved in H<sub>2</sub>O (8 mL) and DMF (6 mL), and then degassed by two freeze-thaw cycles. Subsequently, BEBIB (217 mg, 0.7 mmol) dissolved in DMF (2 mL) was introduced into the flask and the mixed solution was degassed by freeze-thaw again. Polymerization was performed at 35 °C for 3 h and monomer conversion is about 75%. The *N*-*t*Boc-PNIPAM was purified by passing through a Al<sub>2</sub>O<sub>3</sub> Column to remove the copper catalyst and then the sample was deposited in 10-fold excess of cold diethyl ether. The precipitate of *N*-*t*Boc-PNIPAM was then filtered under vacuum and dried in vacuum at room temperature.

To obtain PNIPAM-NH<sub>2</sub>, *N*-*t*Boc-PNIPAM was firstly dissolved in CH<sub>3</sub>OH followed by adding excess K<sub>2</sub>CO<sub>3</sub> solid to totally substitute the Br- to CH<sub>3</sub>O- group. After stirring at room temperature for 12 h, CH<sub>2</sub>Cl<sub>2</sub> was added following the evaporation of

CH<sub>3</sub>OH to dissolve the polymer. Then the polymer was treated with excess trifluoroacetic acid under vigorous stirring to remove the *t*-Boc protection group. Finally, after dialyzed against NaOH aq at pH 10 for three days and deionized water for another 4 days in a dialysis bag with a molecular cutoff of 3500 D, 7 g of PNIPAM-NH<sub>2</sub> was obtained by lyophilizing the solution. The DP was calculated as 130 from GPC (THF as the eluent).

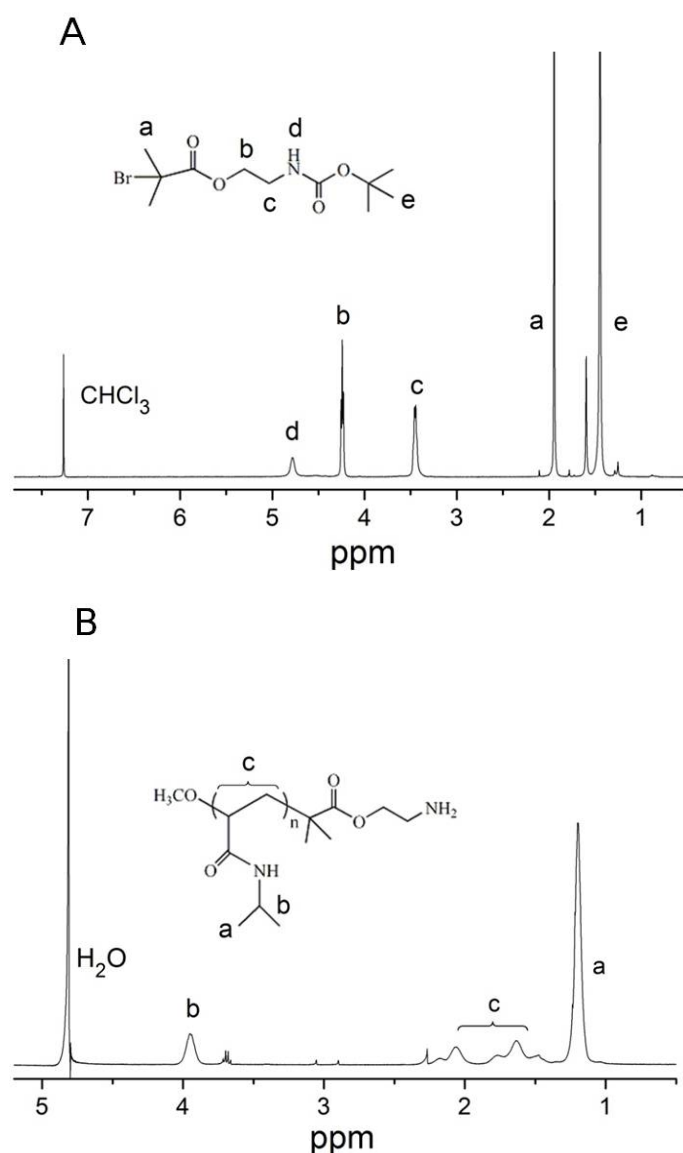

Figure S1. <sup>1</sup>H-NMR spectra of BEBIB in CDCl<sub>3</sub> (A) and PNIPAM<sub>130</sub>-NH<sub>2</sub> in D<sub>2</sub>O (B).

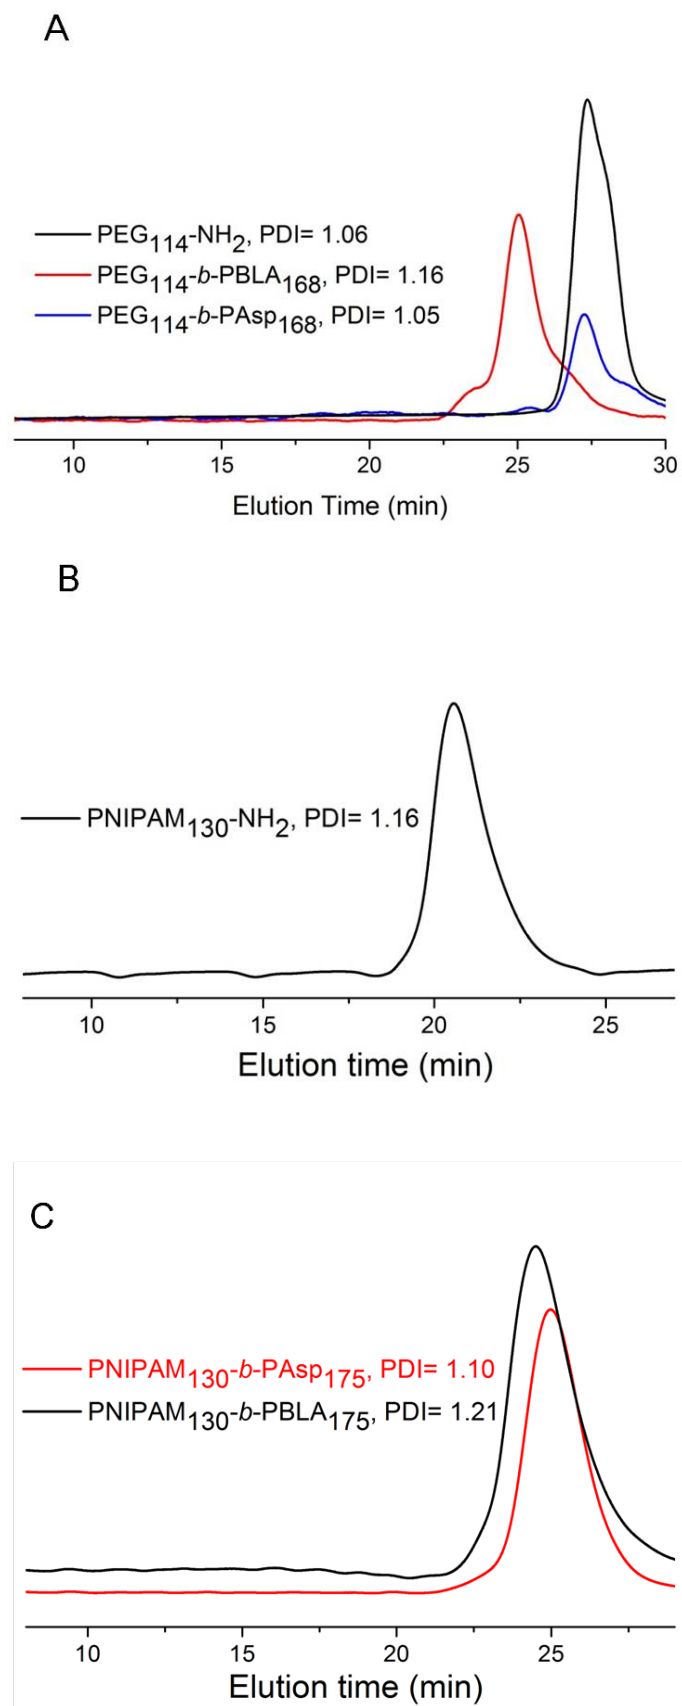

Figure S2. (A) GPC profiles of PEG<sub>114</sub>-NH<sub>2</sub>, PEG<sub>114</sub>-*b*-PBLA<sub>168</sub> and PEG<sub>114</sub>-*b*-PAsp<sub>168</sub> in DMF. (B) GPC profile of PNIPAM<sub>130</sub>-NH<sub>2</sub> in THF. (C) GPC

profiles of PNIPAM<sub>130</sub>-*b*-PBLA<sub>175</sub> and PNIPAM<sub>130</sub>-*b*-PAsp<sub>175</sub> in DMF.

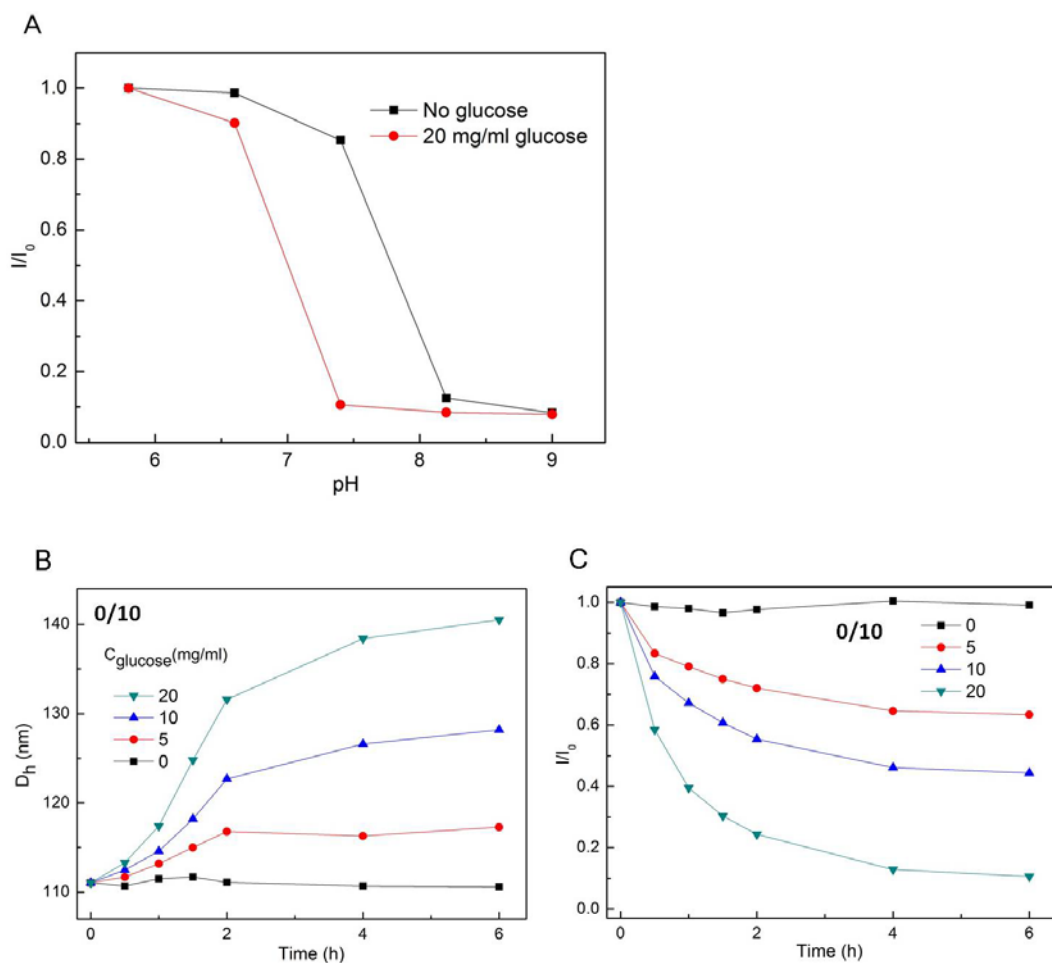

Figure S3. Glucose-responsiveness study of 0/10 PM. (A) pH-dependent Normalized light scattering intensity change with and without addition of glucose solution. Time-dependent hydrodynamic diameter (B) and normalized scattered intensity (C) changes at pH 7.4 and 37 °C under various glucose concentrations, where the scattering angle is 90°.

Table S1. DLS and SLS measurements of PMs with different  $W_{\text{PNIPAM}}/W_{\text{PEG}}$  at 25 and 37 °C. *a*  $D_h$  represents the apparent average hydrodynamic diameter measured at the scattering angle of 90°.

| $W_{\text{PNIPAM}}/W_{\text{PEG}}$ | $t$ (°C) | $D_h^a$ (nm) | $R_h$ (nm) | $R_g$ (nm) | $R_g/R_h$ |
|------------------------------------|----------|--------------|------------|------------|-----------|
| 0/10                               | 25       | 111.5        | 65.9       | 58.0       | 0.88      |
|                                    | 37       | 111.0        | 65.8       | 58.0       | 0.88      |
| 2/8                                | 25       | 102.4        | 60.3       | 53.7       | 0.89      |
|                                    | 37       | 97.6         | 58.2       | 49.5       | 0.85      |
| 4/6                                | 25       | 109.8        | 63.1       | 56.2       | 0.89      |
|                                    | 37       | 102.9        | 59.8       | 48.4       | 0.81      |
| 6/4                                | 25       | 111.6        | 62.5       | 55.6       | 0.89      |
|                                    | 37       | 99.4         | 57.6       | 44.9       | 0.78      |
| 8/2                                | 25       | 105.4        | 61.4       | 55.3       | 0.90      |
|                                    | 37       | 724.2        | -          | -          | -         |

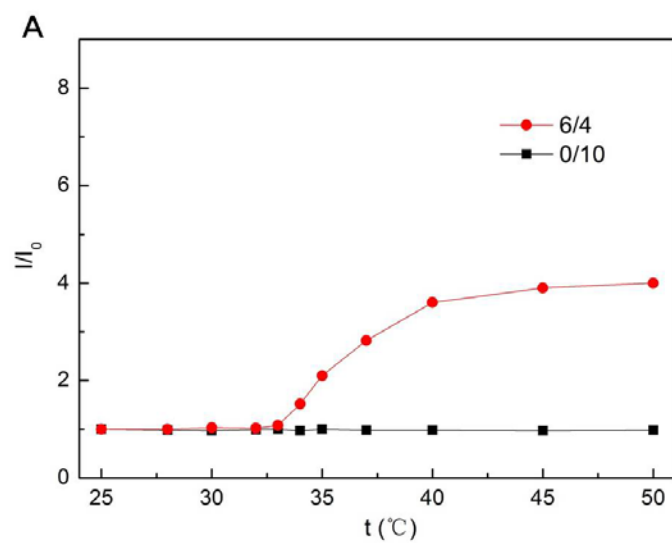

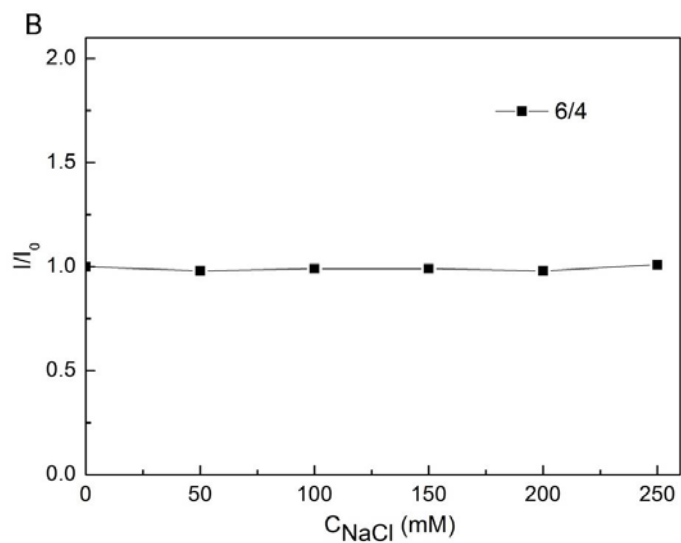

Figure S4. Structure characterization of PMs. (A) Temperature-dependent normalized scattered intensity of 0/10 and 6/4 PMs. (B) salt concentration-dependent normalized scattered intensity of 6/4 PMs.

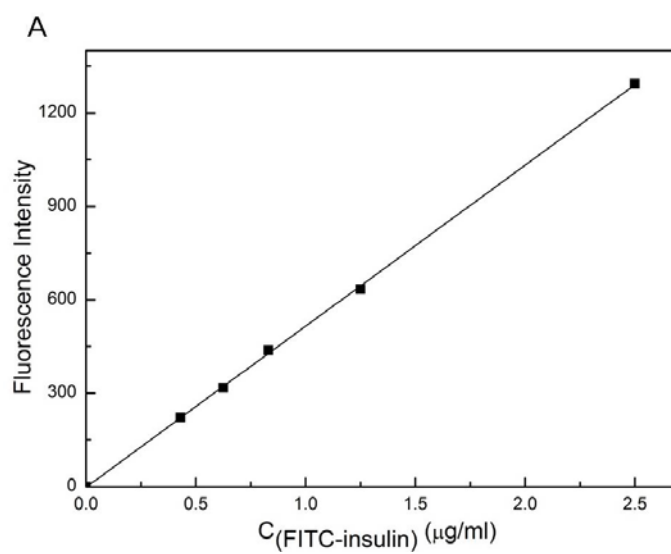

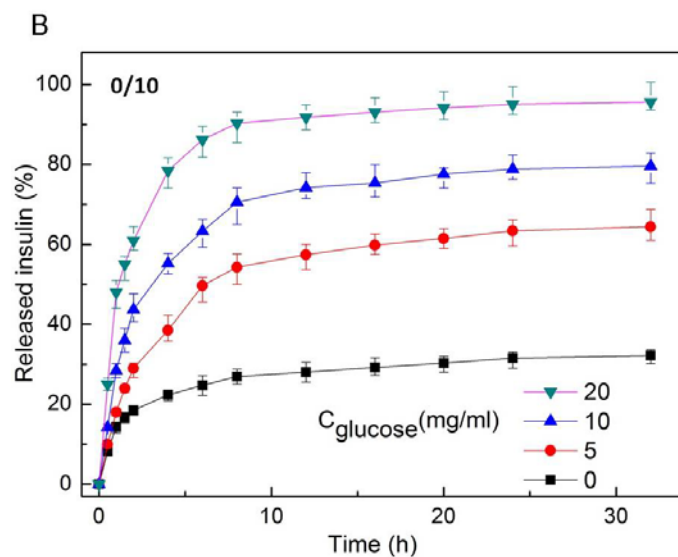

Figure S5. (A) Fluorescence intensity at various concentrations of FITC-insulin. (B) Release profiles of FITC-insulin from 0/10 PMs upon varying concentrations of glucose.

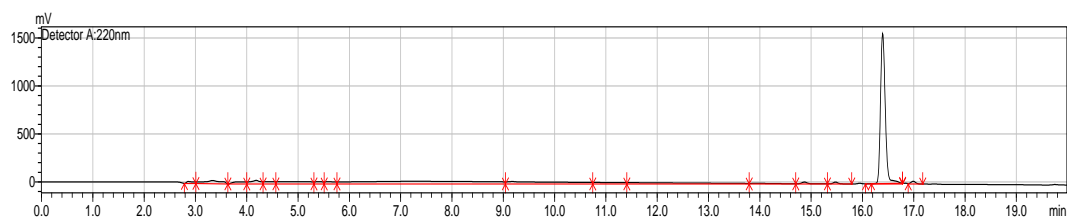

Figure S6. HPLC profile of insulin at 35 °C (mixed solvent: acetonitrile and 0.1% trifluoroacetic acid)



## References:

- 1 Z. Yang, S. Y. Zheng, W. J. Harrison, J. Harder, X. X. Wen, J. G. Gelovani, A. Qiao and C. Li, *Biomacromolecules*, 2007, **8**, 3422-3428.
